# Supplementary material for: Easy and eco-friendly synthesis of ordered mesoporous carbons by self-assembly of tannin with a block copolymer
Source: Royal Society of Chemistry journal article supplement (doi:10.1039/c5gc02788h), 2016-01-01
Supplement: c5gc02788h1.pdf [file c5gc02788h1.pdf]

### Supplementary Information – Green Chemistry

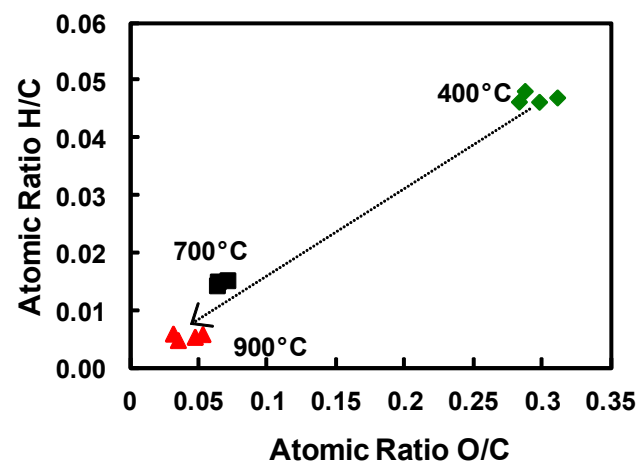

**Fig. S1** van Krevelen diagram for all materials prepared after agitation and posterior pyrolysis at 400, 700 and 900°C.

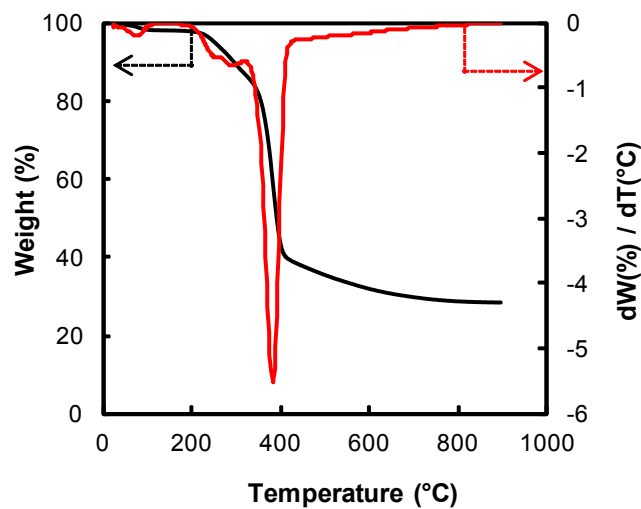

**Fig. S2** TGA analysis in inert atmosphere of Ar made with a ramp of  $5\text{ K min}^{-1}$  till up to  $900^{\circ}C$  for the sample PTW prepared at unmodified pH (4.2).

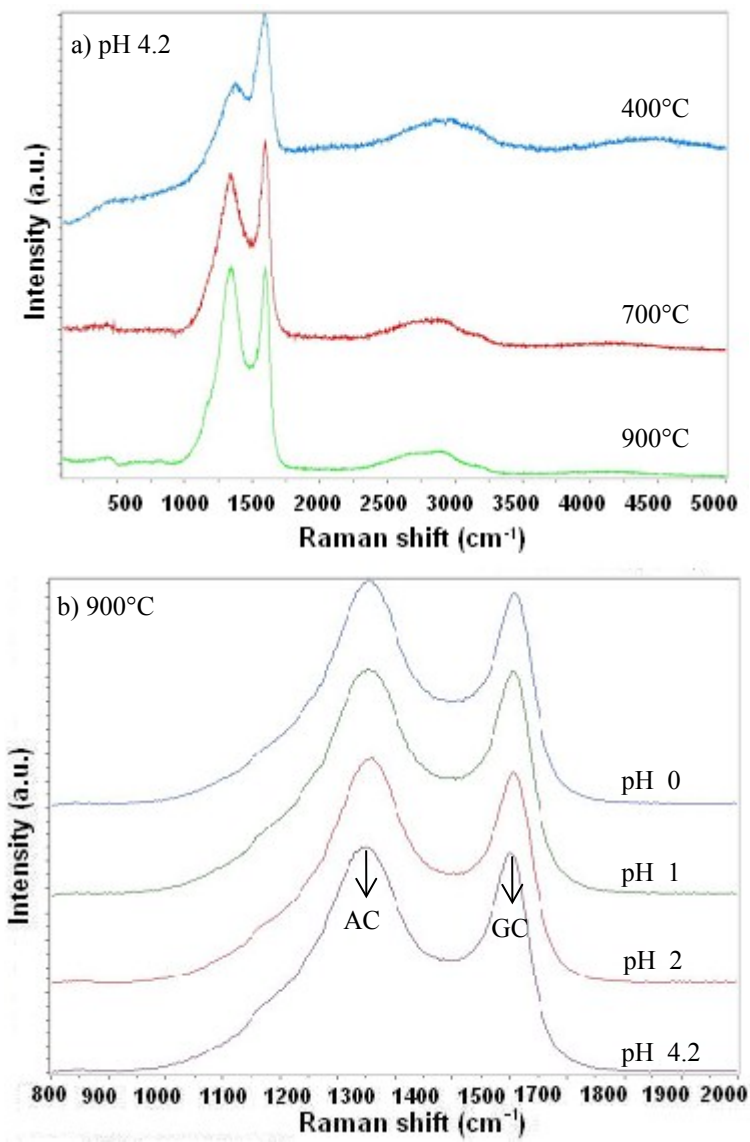

**Fig. S3.** Raman spectra of PTW samples prepared: a) at pH 4.2 after pyrolysis at different temperatures (400, 700 and 900°C) and b) at all pHs: 0, 1, 2 and 4.2 after posterior fixed carbonization temperature of 900°C.
